# Supplementary material
Source: PubMed Central journal article supplement (PMC8371280)
Supplement: sj-pdf-1-jdr-10.1177_00220345211014441.pdf [file sj-pdf-1-jdr-10.1177_00220345211014441.pdf]

**Ventilation assessment by carbon dioxide levels in dental treatment rooms**

Qirong Huang, Tamer Marzouk, Razvan Cirlogeanu, Hans Malmstrom, Eli Eliav, Yan-Fang Ren  
 Eastman Institute for Oral Health, University of Rochester Medical Center, Rochester, New York

**Supplemental materials:**

**Background:** Risks of disease transmission in healthcare settings during infectious disease pandemics have consistently challenged dental care professionals in their efforts to maintain a safe environment for their staffs and patients. Dental care professionals have gained tremendous experiences in infection control from the ongoing HIV/AIDS pandemic by implementing universal or standard precautions against contact and droplet transmissions, but we are less confident in dealing with an infectious respiratory disease that may be transmitted through aerosol particles emitted by patients who have no overt symptoms. With mounting evidence that COVID-19 is transmissible through aerosols in an indoor environment (CDC 2020a; 2020b), additional preventive measures beyond the standard care using personal protective equipment (PPE) are essential to minimize risks and alleviate anxieties experienced by staff and patients due to uncertainties associated with a novel infectious disease pandemic.

Engineering controls through mechanical ventilation are important mechanisms to reduce the risks of airborne disease transmission in an indoor environment such as the dental offices. Though CDC recommends improving ventilation and air filtration in its guidance for dental settings during the COVID-19 pandemic (CDC 2020c), few information is available on how to assess the ventilation condition and what measures to take to achieve more effective engineering control of disease transmission in dental offices.

**Using steady state CO<sub>2</sub> level during dental treatments to estimate ventilation rates:** Ventilation rate estimates based on steady state CO<sub>2</sub> levels during two different treatment procedures at low (0.3 L/min) and high (0.46 L/min) levels of human CO<sub>2</sub> generation rates are presented in Supplemental Table 1 (Batterman 2017, Godwin et al 2003).

**Appendix Table 1:** Ventilation rate estimates based on steady state CO<sub>2</sub> levels

| Rm #        | Procedure   | n   | C <sub>SS</sub> | C <sub>R</sub> | ACH <sub>SS30</sub> | ACH <sub>SS46</sub> |
|-------------|-------------|-----|-----------------|----------------|---------------------|---------------------|
| 002         | Exam        | 4   | 1014            | 410            | 5.2                 | 7.9                 |
|             | Extraction  | 4   | 978             | 410            | 5.5                 | 8.4                 |
| 003         | Extraction  | 4   | 960             | 410            | 5.9                 | 9.0                 |
|             | Extraction  | 4   | 923             | 410            | 6.3                 | 9.7                 |
| 008         | Hygiene     | 2   | 673             | 435            | 4.4                 | 6.7                 |
|             | Hygiene     | 2   | 629             | 435            | 5.4                 | 8.2                 |
| 012         | Hygiene     | 2   | 649             | 434            | 5.8                 | 8.9                 |
|             | Hygiene     | 2   | 632             | 434            | 6.3                 | 9.7                 |
| 019         | Extraction  | 4   | 823             | 403            | 8.8                 | 13.5                |
|             | Restorative | 3   | 616             | 403            | 13.1                | 20.1                |
| 021         | Implant     | 4   | 905             | 410            | 6.0                 | 9.1                 |
|             | Endo        | 4   | 926             | 410            | 5.7                 | 8.8                 |
| 022         | Implant     | 6   | 1269            | 428            | 5.4                 | 8.3                 |
|             | Implant     | 5   | 1089            | 428            | 5.8                 | 8.8                 |
| 031         | Hygiene     | 2   | 544             | 405            | 9.5                 | 14.6                |
|             | Surgery     | 4   | 611             | 405            | 12.9                | 19.7                |
| 032         | Surgery     | 3   | 584             | 404            | 15.8                | 24.2                |
|             | Exam        | 4   | 633             | 404            | 16.7                | 25.5                |
| 033         | Exam        | 3   | 595             | 392            | 9.7                 | 14.8                |
|             | Surgery     | 4   | 662             | 392            | 10.6                | 16.2                |
| <b>Mean</b> | -           | 3.5 | 785.8           | 413.1          | 8.2                 | 12.6                |
| <b>SD</b>   | -           | 1.1 | 206.8           | 14.0           | 3.8                 | 5.8                 |

Based on ventilation rate  $ACH = 6 \times 10^4 n G_p / [V(C_{SS}-C_R)]$ ; n: number of persons in the room; V: volumetric size in m<sup>3</sup>. C<sub>SS</sub>: steady state CO<sub>2</sub> level in ppm; C<sub>R</sub>: outdoor CO<sub>2</sub> level in ppm; ACH<sub>SS30</sub>: ventilation estimate based on CO<sub>2</sub> generation rate G<sub>p</sub>=0.3L/min per person; ACH<sub>SS46</sub>: ventilation estimate based on CO<sub>2</sub> generation rate G<sub>p</sub>=0.46L/min per person;

Appendix Table 2 could be used to roughly estimate the ventilation rate of the dental treatment rooms in 3 steps. First, measure the length and width of the room to get the area in square feet (ft<sup>2</sup>). Second, determine the steady state CO<sub>2</sub> level during a dental treatment procedure that lasts more than 10 minutes as follows: with the dentist, dental assistant and the patient together in the room and without any person entering or leaving the room, read the CO<sub>2</sub> sensor readings 10 minutes into the procedure and record the next 5 readings at 1 min interval, add the 5 readings to get the sum and divide the sum by 5, the result is the steady state CO<sub>2</sub> level. Third, match the steady state CO<sub>2</sub> level to the closest number under the area column of your room size, the number in the ACH column in the same row is the ventilation rate estimate. For example, if the CO<sub>2</sub> level reaches a steady state level of about 1062 ppm during a dental treatment that lasted longer than 5 minutes with 3 persons in a room that is 110 ft<sup>2</sup> (10-ft W x11-ft L) in area, the ventilation rate is about 3 ACH. It will be about 6 ACH if the CO<sub>2</sub> level stays at about 761 ppm (Appendix Table 2).

**Appendix Table 2: Steady state CO<sub>2</sub> levels and ventilation rate in air change per hour (ACH)\***

| Area (ft <sup>2</sup> ) \ ACH | 100  | 110  | 120  | 130  | 140  | 150  | 160  | 170  | 180  | 190  | 200  |
|-------------------------------|------|------|------|------|------|------|------|------|------|------|------|
| 1                             | 2784 | 2567 | 2386 | 2234 | 2103 | 1989 | 1890 | 1802 | 1724 | 1655 | 1592 |
| 2                             | 1592 | 1484 | 1393 | 1317 | 1251 | 1195 | 1145 | 1101 | 1062 | 1027 | 996  |
| 3                             | 1195 | 1122 | 1062 | 1011 | 968  | 930  | 897  | 867  | 841  | 818  | 797  |
| 4                             | 996  | 942  | 897  | 858  | 826  | 797  | 772  | 751  | 731  | 714  | 698  |
| 5                             | 877  | 833  | 797  | 767  | 741  | 718  | 698  | 680  | 665  | 651  | 638  |
| 6                             | 797  | 761  | 731  | 706  | 684  | 665  | 648  | 634  | 621  | 609  | 599  |
| 7                             | 741  | 710  | 684  | 662  | 643  | 627  | 613  | 600  | 589  | 579  | 570  |
| 8                             | 698  | 671  | 648  | 629  | 613  | 599  | 586  | 575  | 566  | 557  | 549  |
| 9                             | 665  | 641  | 621  | 604  | 589  | 577  | 566  | 556  | 547  | 539  | 532  |
| 10                            | 638  | 617  | 599  | 583  | 570  | 559  | 549  | 540  | 532  | 525  | 519  |
| 11                            | 617  | 597  | 581  | 567  | 555  | 544  | 535  | 527  | 520  | 514  | 508  |
| 12                            | 599  | 581  | 566  | 553  | 542  | 532  | 524  | 517  | 510  | 505  | 499  |
| 13                            | 583  | 567  | 553  | 541  | 531  | 522  | 515  | 508  | 502  | 497  | 492  |
| 14                            | 570  | 555  | 542  | 531  | 522  | 514  | 506  | 500  | 495  | 490  | 485  |
| 15                            | 559  | 544  | 532  | 522  | 514  | 506  | 499  | 493  | 488  | 484  | 479  |

\*Based on ventilation rate  $ACH = 6 \times 10^4 n G_p / [V(C_{SS}-C_R)]$ , where number of persons in the room  $n=3$ , CO<sub>2</sub> generation rate per person  $G_p=0.3L/min$ , outdoor CO<sub>2</sub> level  $C_R=400$  ppm, and  $V$  is the volumetric size of the room with ceiling height = 8-ft.

**Protocol for assessing ventilation rates by CO<sub>2</sub> decays using dry ice:** Outside air CO<sub>2</sub> level was first measured for 5 minutes near the air intake of the ventilation system outside the building before each experiment. To raise the peak CO<sub>2</sub> levels inside the dental treatment rooms to approximately 2000 ppm, 250g of dry ice was placed in a water bath and left in the room for two minutes. A small oscillating fan was used to keep the CO<sub>2</sub> well mixed in the room. CO<sub>2</sub> level was then measured at one-minute intervals using a consumer-grade CO<sub>2</sub> sensor (Aranet4, range 0-9999ppm, accuracy ±50ppm, SAF Tehnika, Riga, Latvia) for up two hours. The consumer-grade Aranet4 CO<sub>2</sub> sensor used in the current study was purchased at amazon.com in the US. It was recommended by the Federation of European Heating, Ventilation and Air Conditioning Associations (REHVA) for monitoring CO<sub>2</sub> levels in schools during the COVID-19 pandemic (REHVA 2020), and was found to be comparable to a research-grade LI-COR CO<sub>2</sub> sensor in accuracy and suitable for the time-response assessment in this study (Jimenez 2020).

**Protocols for assessing ventilation rates by CO<sub>2</sub> decays using baking soda:** We tested peak CO<sub>2</sub> values in the 10 treatment rooms after mixing baking soda with vinegar using a weight (g):volume (ml) ratio of 1:15 based on the molar masses of the reagents. We aimed at a peak level range of 1500 to 2000 ppm in rooms with various mechanical ventilation rates and with doors closed. We determined

Ventilation and CO<sub>2</sub> levels in dental offices – Appendix

that adding about 125g of baking soda (approximately 3/5 cup measure) to 1893 ml (a 64-oz bottle) of vinegar containing 5% acetic acid will elevate the CO<sub>2</sub> level in a typical dental treatment room (10 x 11 ft in area, 8 ft in ceiling height, or 880 ft<sup>3</sup> in volume) with a moderate ventilation rate (ACH<sub>VENT</sub> = 4) to above 1500 ppm. For rooms that are significantly larger or having very high ventilation rates, one full cup measure (about 8 oz or 227g) of baking soda may be used with 3785 ml (a one-gallon jar) of vinegar containing 5% acetic acid.

**Calculating ventilation rate using CO<sub>2</sub> level change after mixing baking soda and vinegar:** Details of ventilation rates calculated by time needed to remove 63% of excess CO<sub>2</sub> generated by dry ice or baking soda are presented in Appendix Table 3.

**Appendix Table 3:** Ventilation rate estimates by time needed to remove 63% excess CO<sub>2</sub> released by dry ice or baking soda and vinegar

| RM# | Method | C <sub>R</sub><br>ppm | C <sub>S</sub><br>ppm | C <sub>E</sub><br>ppm | C <sub>63%E</sub><br>ppm | t <sub>2</sub><br>min | ACH <sub>T63%</sub><br>60/t <sub>2</sub> |
|-----|--------|-----------------------|-----------------------|-----------------------|--------------------------|-----------------------|------------------------------------------|
| 002 | DI     | 403                   | 3956                  | 3553                  | 1718                     | 10.7                  | 5.6                                      |
|     | BV     | 410                   | 2800                  | 2390                  | 1294                     | 9.9                   | 6.1                                      |
| 003 | DI     | 416                   | 3552                  | 3136                  | 1576                     | 12.3                  | 4.9                                      |
|     | BV     | 412                   | 1901                  | 1489                  | 963                      | 12.3                  | 4.9                                      |
| 008 | DI     | 434                   | 2459                  | 2025                  | 1183                     | 9.0                   | 6.7                                      |
|     | BV     | 399                   | 2290                  | 1891                  | 1099                     | 8.8                   | 6.8                                      |
| 012 | DI     | 427                   | 3064                  | 2637                  | 1403                     | 6.5                   | 9.2                                      |
|     | BV     | 410                   | 2340                  | 1930                  | 1124                     | 6.4                   | 9.4                                      |
| 019 | DI     | 434                   | 2901                  | 2467                  | 1347                     | 2.0                   | 30.8                                     |
|     | BV     | 399                   | 1112                  | 713                   | 663                      | 2.2                   | 27.3                                     |
| 021 | DI     | 434                   | 4265                  | 3831                  | 1852                     | 13.5                  | 4.4                                      |
|     | BV     | 410                   | 1782                  | 1372                  | 917                      | 10.6                  | 5.7                                      |
| 022 | DI     | 427                   | 4103                  | 3676                  | 1787                     | 14.7                  | 4.1                                      |
|     | BV     | 399                   | 2474                  | 2075                  | 1167                     | 13.0                  | 4.6                                      |
| 031 | DI     | 427                   | 2066                  | 1639                  | 1033                     | 3.5                   | 17.2                                     |
|     | BV     | 416                   | 2006                  | 1590                  | 1004                     | 3.6                   | 16.7                                     |
| 032 | DI     | 427                   | 2703                  | 2276                  | 1269                     | 3.5                   | 17.3                                     |
|     | BV     | 410                   | 2139                  | 1729                  | 1049                     | 2.7                   | 22.2                                     |
| 033 | DI     | 434                   | 2530                  | 2096                  | 1210                     | 4.2                   | 14.3                                     |
|     | BV     | 432                   | 1291                  | 859                   | 750                      | 3.7                   | 16.2                                     |

DI: dry ice. BV: baking soda and vinegar. C<sub>R</sub>: outdoor CO<sub>2</sub> level. C<sub>S</sub>: peak CO<sub>2</sub> level after CO<sub>2</sub> generation by dry ice or baking soda. C<sub>E</sub>: excess CO<sub>2</sub> generated by dry ice or baking soda (C<sub>S</sub> - C<sub>R</sub>). C<sub>63%E</sub>: CO<sub>2</sub> level after 63% excess CO<sub>2</sub> is removed (C<sub>S</sub> - 63% C<sub>E</sub>). t<sub>2</sub>: time (min) needed to reach C<sub>63%E</sub>. ACH<sub>T63%</sub>: ventilation rate in air change per air based on t<sub>2</sub>

Appendix Table 4 is a dynamic template that will allow you to enter 3 values to get the ventilation rate in air change per hour (ACH) for your treatment rooms: 1, the peak CO<sub>2</sub> level (C<sub>S</sub>), 2, the outdoor CO<sub>2</sub> level, and 3. Time needed to reach 63% removal of excess CO<sub>2</sub>. (Fernstrom and Goldblatt 2013; Jimenez 2020; Nardell et al. 1991)

**Appendix Table 4:** Ventilation rate estimate using time needed to remove 63% excess CO<sub>2</sub> generated by baking soda and vinegar

|                                                  |      |                 |                                                                                                                                           |
|--------------------------------------------------|------|-----------------|-------------------------------------------------------------------------------------------------------------------------------------------|
| CO <sub>2</sub> at peak                          | 2800 | ppm             | B1. C <sub>S</sub> = Peak CO <sub>2</sub> level C <sub>S</sub>                                                                            |
| CO <sub>2</sub> outdoors                         | 400  | ppm             | B2. C <sub>R</sub> = Outdoor CO <sub>2</sub> level C <sub>R</sub>                                                                         |
| Excess CO <sub>2</sub>                           | 2400 | ppm             | B3. C <sub>E</sub> = Excess CO <sub>2</sub> . C <sub>E</sub> = C <sub>S</sub> -C <sub>R</sub>                                             |
| After removal of 63% excess CO <sub>2</sub>      | 1288 | ppm             | B4. C <sub>63%</sub> = CO <sub>2</sub> level after removal of 63% C <sub>E</sub> . C <sub>63%</sub> = C <sub>S</sub> - 63% C <sub>E</sub> |
| Time needed to remove 63% excess CO <sub>2</sub> | 15.0 | min             | B5. Time to reach C <sub>63%</sub> (Value in B4)                                                                                          |
| Ventilation rate                                 | 4.0  | h <sup>-1</sup> | B6. Air change per hour, or ACH                                                                                                           |

To calculate air change per hour, 3 values need to be entered into the above template:

1. C<sub>S</sub>: this is the CO<sub>2</sub> level when the measurement starts after CO<sub>2</sub> generation by mixing baking soda and vinegar for 2 minutes.
2. Outdoor CO<sub>2</sub> level. You could use 400 ppm as an estimate for this value.
3. Time needed to reach 63% removal of excess CO<sub>2</sub>.

You need to read the value in B5 and check the CO<sub>2</sub> sensor readings to get the time needed to reach 63% removal of excess CO<sub>2</sub>.

**Application notes:** It is important to point out that the setting for the current study is a postdoctoral dental training institution affiliated with an academic medical center, which may differ significantly in ventilation conditions from private dental practices that have a solo or a few dental practitioners. Ventilation conditions in different dental settings are largely unknown as the ventilation design of dental offices is not regulated as other outpatient healthcare facilities that are required to have 6 to 15 ACH by ASHRAE and CDC (Chinn and Sehulster 2003; Ninomura and Bartley 2001). Godwin and colleagues reported that ventilation rate was 1.12 ACH in dental operatories of a small dental clinic (2400 ft<sup>2</sup>) (Godwin et al. 2003), which is significantly lower than the mean of 13 ACH in the present study but resembles more closely to the mean of 1.09 ACH in typical residential households in the US (Sherman and Matson 1997).

We consider that it is very important for every dental practitioner to be able to accurately assess the ventilation rate in their working environments. Epidemiological data showed that transmission of COVID-19 is almost exclusively an indoor phenomenon, with 99.97% of the transmissions occurring in an indoor environment (Qian et al. 2020). Airborne transmission through respiratory aerosols is increasingly recognized as a major driver for the COVID-19 pandemic (Morawska and Milton 2020; Noorimotlagh et al. 2020; Zhang et al. 2020). As essential healthcare providers, dental professionals work in the frontline during the pandemic and need to adopt measures to mitigate the risk of aerosol transmission in addition to droplet and contact precautions that have been the standard of infection control in dental offices (Harte 2010).

Our data showed that household baking soda (NaHCO<sub>3</sub>) and vinegar (5% acetic acid) could be used to generate CO<sub>2</sub> in dental office to assess the ventilation rate by observing the CO<sub>2</sub> concentration decays using a CO<sub>2</sub> sensor and a basic calculator. This method will allow dental practitioners to reliably estimate the ventilation rate in their dental offices without expensive equipment and advanced technical skills. The test could be completed within 30 minutes in spaces with ventilation rate higher than 2 ACH but may take longer time if the ventilation is significantly below 1 ACH. We recommend to plan a two-hour observation time during off-hours with the building ventilation system operating in its normal setting.

Although ventilation rate in ACH could be calculated by fitting a linear regression line over time into the natural log scale of time-varying concentrations of CO<sub>2</sub> levels (equation #2), we found that a simplified method (equation #4) provided equally if not more accurate estimate of ventilation rate. As it is known that one complete air change replaces 63% of airborne contaminants with outdoor air (Fernstrom and Goldblatt 2013; Jimenez 2020; Nardell et al. 1991), ventilation rate could be easily calculated using the time needed to remove 63% of excess CO<sub>2</sub>. For example, assuming outdoor CO<sub>2</sub> level is 400ppm, and peak CO<sub>2</sub> level is 1500ppm after mixing baking soda with vinegar inside the dental office for 2 minutes, excess CO<sub>2</sub> inside the room will be 1500–400=1100ppm at peak. The CO<sub>2</sub> level that represents 63% removal of excess CO<sub>2</sub> is therefore 1500–63% x1100=807ppm. If it takes 15min for CO<sub>2</sub> level to reach 807ppm from the peak of 1500ppm, ventilation rate will be 60/15=4 ACH; and if it takes 2 hours for the CO<sub>2</sub> level to reach 807ppm, it will be 60/120 = 0.5 ACH. This method will allow dental care professionals to accurately estimate ventilation rate using a simple calculator.

#### Abbreviations:

|                     |                                                                                                                                       |
|---------------------|---------------------------------------------------------------------------------------------------------------------------------------|
| ACH                 | air change per hour                                                                                                                   |
| ACH <sub>VENT</sub> | air change per hour measured by an air velocity sensor integrated in an airflow balancing hood at air supply vent or air exhaust vent |
| ACH <sub>SS30</sub> | air change per hour calculated from steady state CO <sub>2</sub> levels at a CO <sub>2</sub> generation rate of 0.30L/min             |

## Ventilation and CO<sub>2</sub> levels in dental offices – Appendix

|                     |                                                                                                                           |
|---------------------|---------------------------------------------------------------------------------------------------------------------------|
| ACH <sub>SS46</sub> | air change per hour calculated from steady state CO <sub>2</sub> levels at a CO <sub>2</sub> generation rate of 0.46L/min |
| ACH <sub>DI</sub>   | air change per hour calculated by CO <sub>2</sub> clearance using the dry ice method                                      |
| ACH <sub>BV</sub>   | air change per hour calculated by CO <sub>2</sub> clearance using the baking soda and vinegar method                      |
| ACH <sub>DI63</sub> | air change per hour calculated from time needed to remove 63% excess CO <sub>2</sub> generated by dry ice                 |
| ACH <sub>BV63</sub> | air change per hour calculated from time needed to remove 63% excess CO <sub>2</sub> generated by baking soda and vinegar |

**References:**

- C.D.C. How covid-19 spreads. 2020a. [accessed 2021 Feb. 4]. <https://www.cdc.gov/coronavirus/2019-ncov/prevent-getting-sick/how-covid-spreads.html>.
- C.D.C. Scientific brief: Sars-cov-2 and potential airborne transmission. 2020b. [accessed 2021 Feb. 4]. <https://www.cdc.gov/coronavirus/2019-ncov/more/scientific-brief-sars-cov-2.html>.
- C.D.C. Uidance for dental settings - interim infection prevention and control guidance for dental settings during the covid-19 pandemic. 2020c. [accessed 2021 Feb. 4]. <https://www.cdc.gov/coronavirus/2019-ncov/hcp/dental-settings.html>.
- Chinn RYW, Sehulster L. 2003. Guidelines for environmental infection control in health-care facilities; recommendations of cdc and healthcare infection control practices advisory committee (hicpac).
- Fernstrom A, Goldblatt M. 2013. Aerobiology and its role in the transmission of infectious diseases. *J Pathog.* 2013:493960-493960.
- Godwin CC, Batterman SA, Sahni SP, Peng CY. 2003. Indoor environment quality in dental clinics: Potential concerns from particulate matter. *Am J Dent.* 16(4):260-266.
- Harte JA. 2010. Standard and transmission-based precautions: An update for dentistry. *J Am Dent Assoc.* 141(5):572-581.
- Jimenez, j-l. How to quantify the ventilation rate of an indoor space using an affordable co2 monitor. 2020. [accessed 2021 Feb. 4]. [https://medium.com/@jjose\\_19945/how-to-quantify-the-ventilation-rate-of-an-indoor-space-using-a-cheap-co2-monitor-4d8b6d4dab44](https://medium.com/@jjose_19945/how-to-quantify-the-ventilation-rate-of-an-indoor-space-using-a-cheap-co2-monitor-4d8b6d4dab44).
- Morawska L, Milton DK. 2020. It is time to address airborne transmission of coronavirus disease 2019 (covid-19). *Clin Infect Dis.* 71(9):2311-2313.
- Nardell EA, Keegan J, Cheney SA, Etkind SC. 1991. Airborne infection. Theoretical limits of protection achievable by building ventilation. *Am Rev Respir Dis.* 144(2):302-306.
- Ninomura P, Bartley J. 2001. New ventilation guidelines for health-care facilities. *ASHRAE Journal,* 43(6):29-32.
- Noorimotlagh Z, Jaafarzadeh N, Martínez SS, Mirzaee SA. 2020. A systematic review of possible airborne transmission of the covid-19 virus (sars-cov-2) in the indoor air environment. *Environ Res.* 193:110612.
- Qian H, Miao T, Liu L, Zheng X, Luo D, Li Y. 2020. Indoor transmission of sars-cov-2. *Indoor Air.*
- Sherman MH, Matson N. 1997. Residential ventilation and energy characteristics. *ASHRAE Trans.* 103:717-730.
- Zhang R, Li Y, Zhang AL, Wang Y, Molina MJ. 2020. Identifying airborne transmission as the dominant route for the spread of covid-19. *Proc Natl Acad Sci U S A.* 117(26):14857-14863.

**Correspondence to:**

*Yanfang Ren, DDS, PhD, MPH*  
*Professor*  
*Eastman Institute for Oral Health*  
*University of Rochester Medical Center*  
*625 Elmwood Ave, Rochester, New York 14620, USA*  
[Yanfang\\_ren@urmc.rochester.edu](mailto:Yanfang_ren@urmc.rochester.edu)  
*Phone: +1 585 273 5588*
